# Supplementary material for: Effect of Testosterone Treatment on Glucose Metabolism in Men With Type 2 Diabetes: A Randomized Controlled Trial
Source: Oxford University Press journal article supplement (doi:10.2337/dc13-2845), 2014-05-08

# SUPPLEMENTARY DATA

**Supplementary Table 1.** Previous Randomized controlled Trials of Testosterone Therapy in Men with Type 2 Diabetes or the Metabolic Syndrome.

|                                | n                | Age<br>y | BMI<br>kg/m <sup>2</sup> | HbA1c<br>Base-<br>line<br>% | Study<br>Length<br>wks | Drop-out<br>% | TT<br>Base-<br>line | TT<br>on<br>Treat-<br>ment | HOMA-IR<br>% Change <sup>d</sup> | HbA1c<br>% | Body Composition                            |
|--------------------------------|------------------|----------|--------------------------|-----------------------------|------------------------|---------------|---------------------|----------------------------|----------------------------------|------------|---------------------------------------------|
| Kapoor <sup>21</sup>           | 24               | 64       | 33                       | 7.3                         | 12                     | 0             | 8.6                 | 12.8                       | -39*                             | -0.37*     | Waist -1.6 cm*<br>Body fat: NC <sup>e</sup> |
| Gopal <sup>36</sup>            | 22               | 44       | 24                       | 7.0                         | 12                     | 0             | 10.1                | NR                         | NC                               | NC         | Waist NC                                    |
| Kalin-<br>chenko <sup>37</sup> | 184 <sup>a</sup> | 52       | 35                       | NR                          | 30                     | 7             | 6.7                 | 13.1                       | -31*                             | NR         | Body Weight -4.3kg*<br>Waist -6cm*          |
| Jones <sup>38</sup>            | 220 <sup>b</sup> | 60       | 32                       | 7.2 <sup>c</sup>            | 26                     | 29            | 9.4                 | 19.5                       | -15*                             | NC         | Waist NC<br>Body fat: NC <sup>e</sup>       |
| Solvay <sup>#</sup>            | 180              | NR       | NR                       | 7-9.5                       | 26                     | 11            | <13                 | NR                         | NC                               | NC         | LBM = +1.4kg <sup>f</sup>                   |

<sup>a</sup>Participants had a diagnosis of the Metabolic Syndrome, 56 of whom also had type 2 diabetes. <sup>b</sup>Men had either diabetes (n=137) and or the Metabolic syndrome. <sup>c</sup>subgroup with type 2 diabetes. <sup>d</sup>% change relative to baseline. <sup>e</sup>Measured by bioelectrical impedance. <sup>f</sup>Methodology not reported. \*p<0.05.

Testosterone was measured by immunoassay in these studies, and body composition changes were inferred from anthropometric or bioelectrical impedance measurements as indicated.

#unpublished, accessed at

<http://www.solvaypharmaceuticals.com/static/wma/pdf/1/3/4/4/2/S176.2.101.pdf>.

TT=total testosterone (nmol/L); Waist= waist circumference; NR= not reported; NC= no change (p >0.05). Adapted and updated from (13).

**Supplementary Figure 1.** Study Flow Diagram.

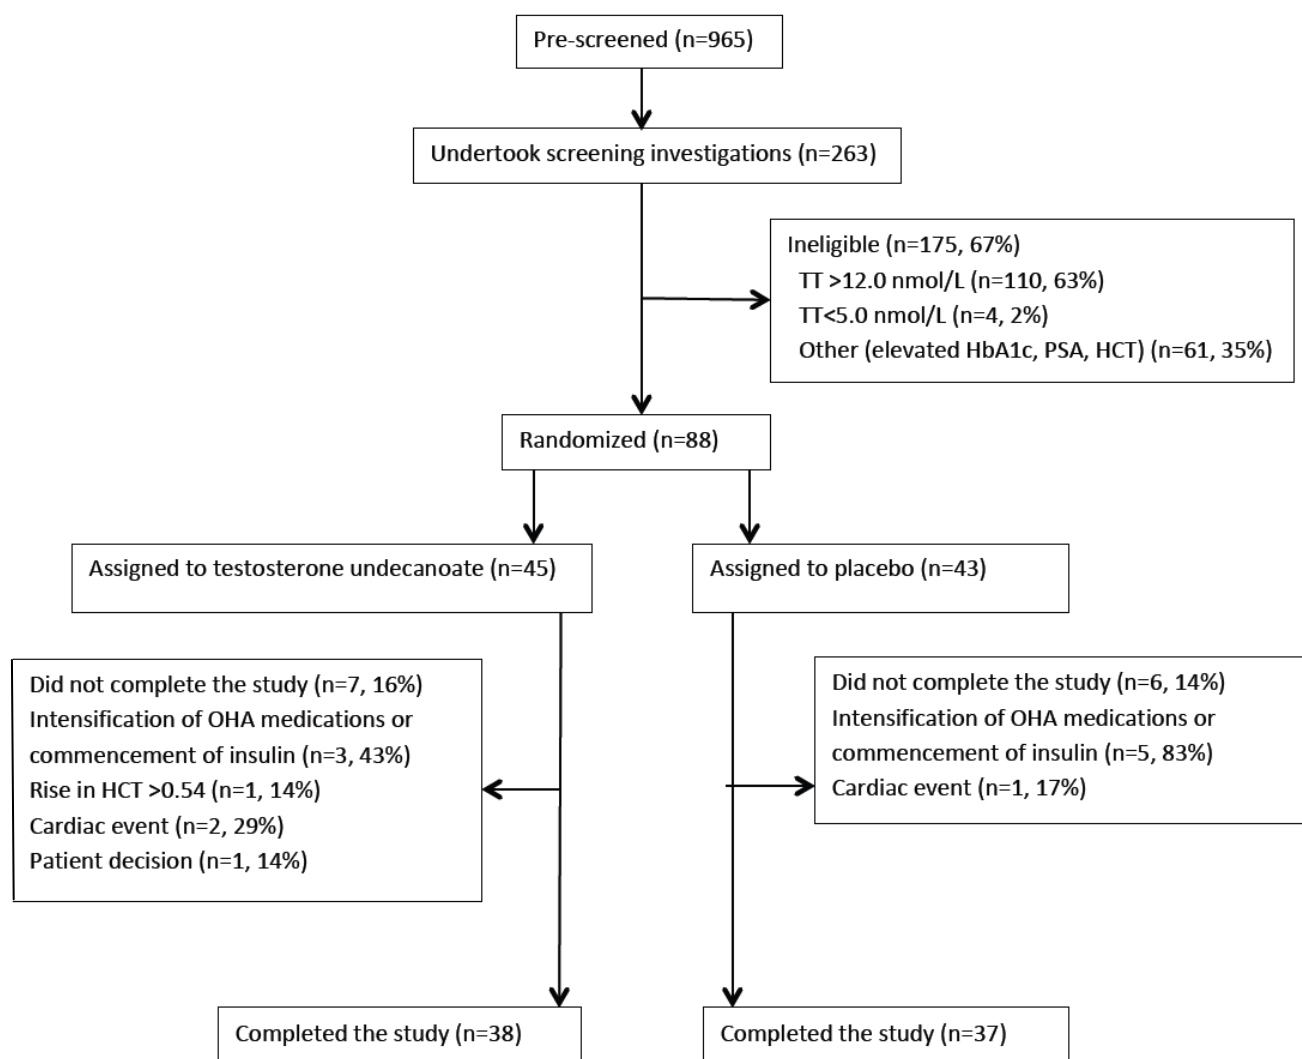

## SUPPLEMENTARY DATA

**Supplementary Figure 2.** Changes in Circulating Hormones in the Testosterone and Placebo Groups. P-values refer to the change between groups over the entire observation period (mixed model, see Methods). The testosterone-treated group is indicated in dark grey, the placebo-treated group in light grey. Mean adjusted differences between groups across time are reported in Results. After 40 weeks, hormone levels had significantly changed (increase in TT, cFT and decrease in LH, SHBG) in the testosterone group only ( $p < 0.001$ ).

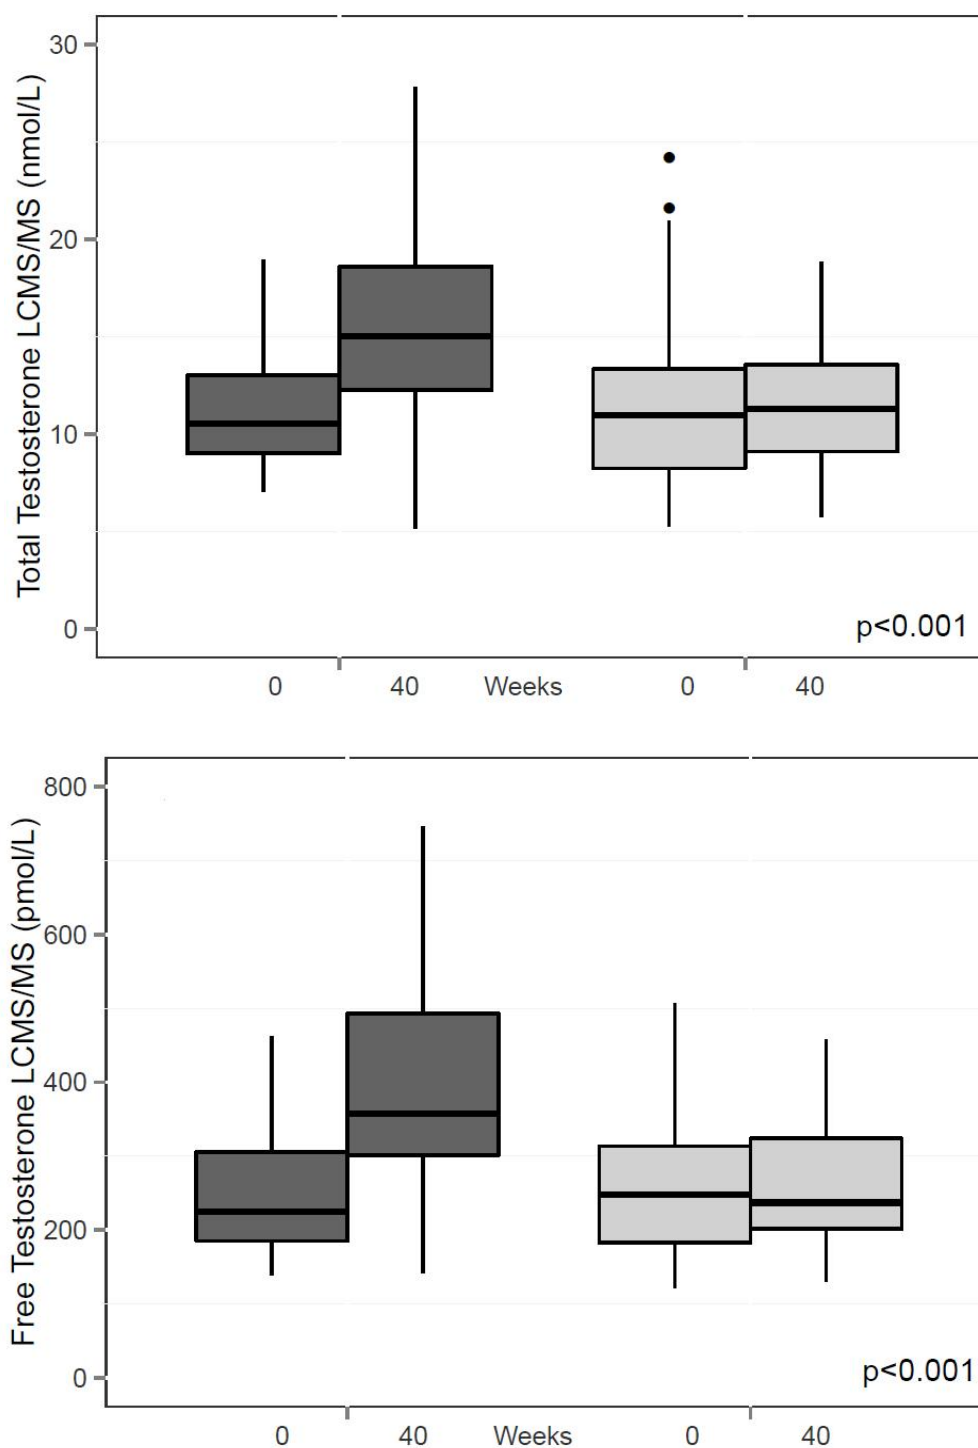

## SUPPLEMENTARY DATA

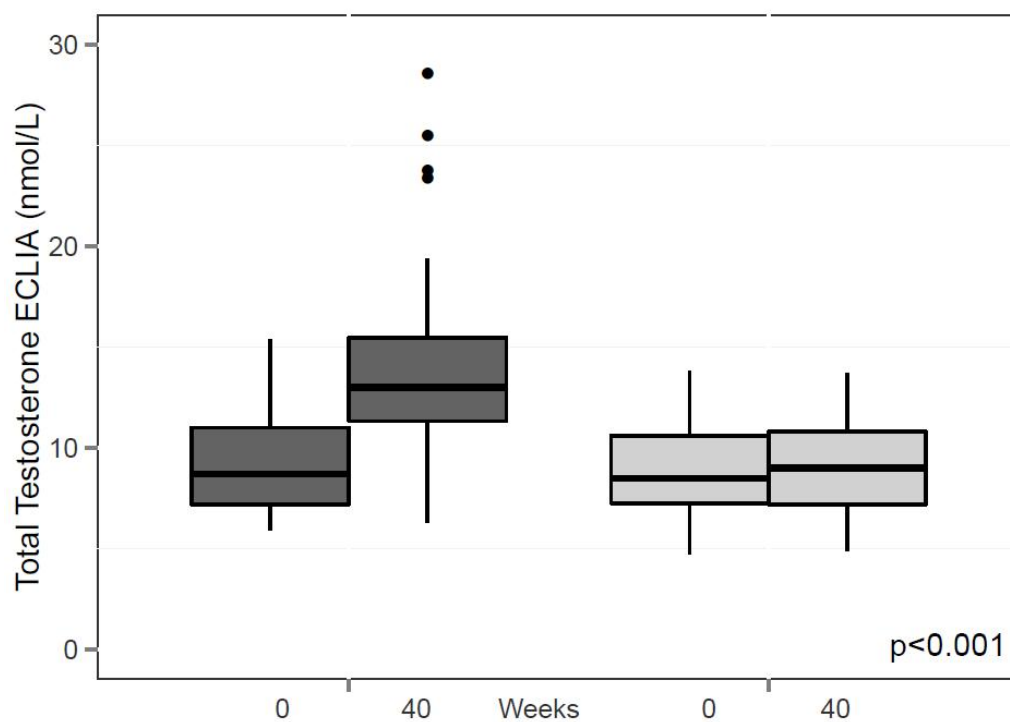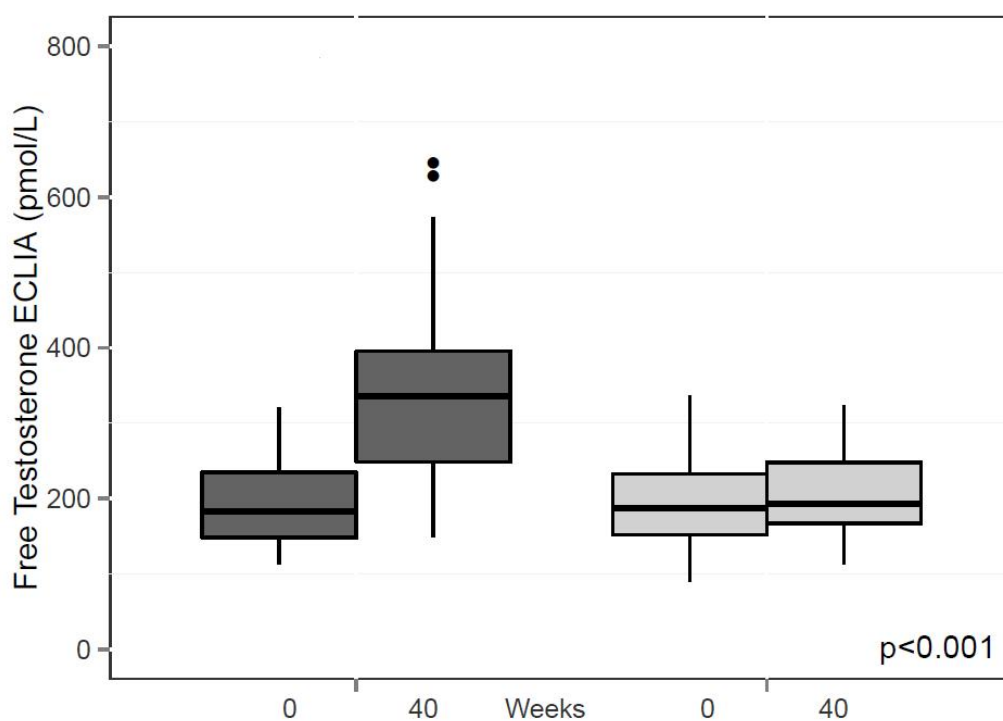

## SUPPLEMENTARY DATA

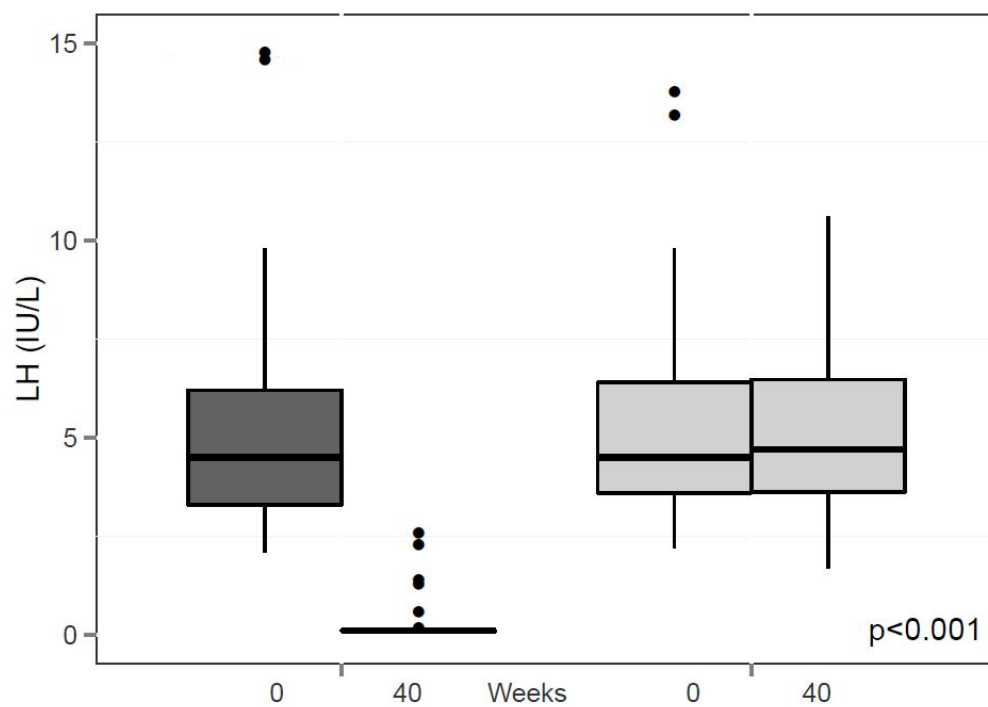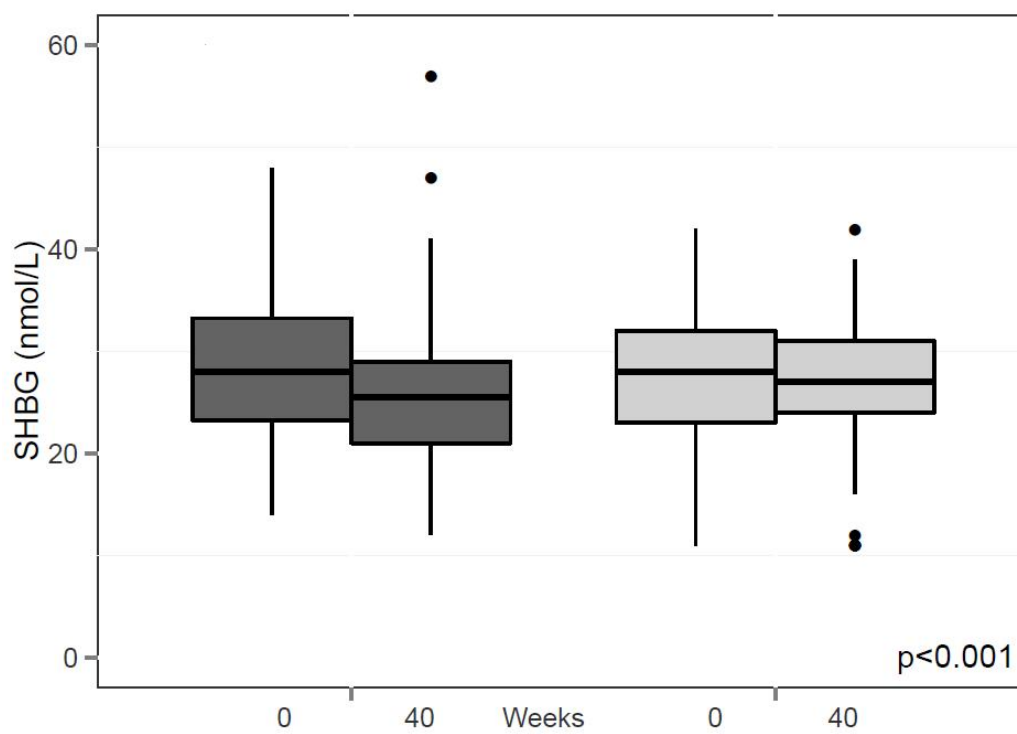

## SUPPLEMENTARY DATA

**Supplementary Figure 3.** Changes in Hemoglobin, Hematocrit and PSA in Testosterone and Placebo Groups. P-values refer to the change between groups over the entire observation period (mixed model, see Methods). The testosterone-treated group is indicated in dark grey, the placebo-treated group in light grey. Mean adjusted differences are reported in Results. After 40 weeks, hemoglobin, hematocrit and PSA increased in the testosterone group only ( $p<0.001$ ).

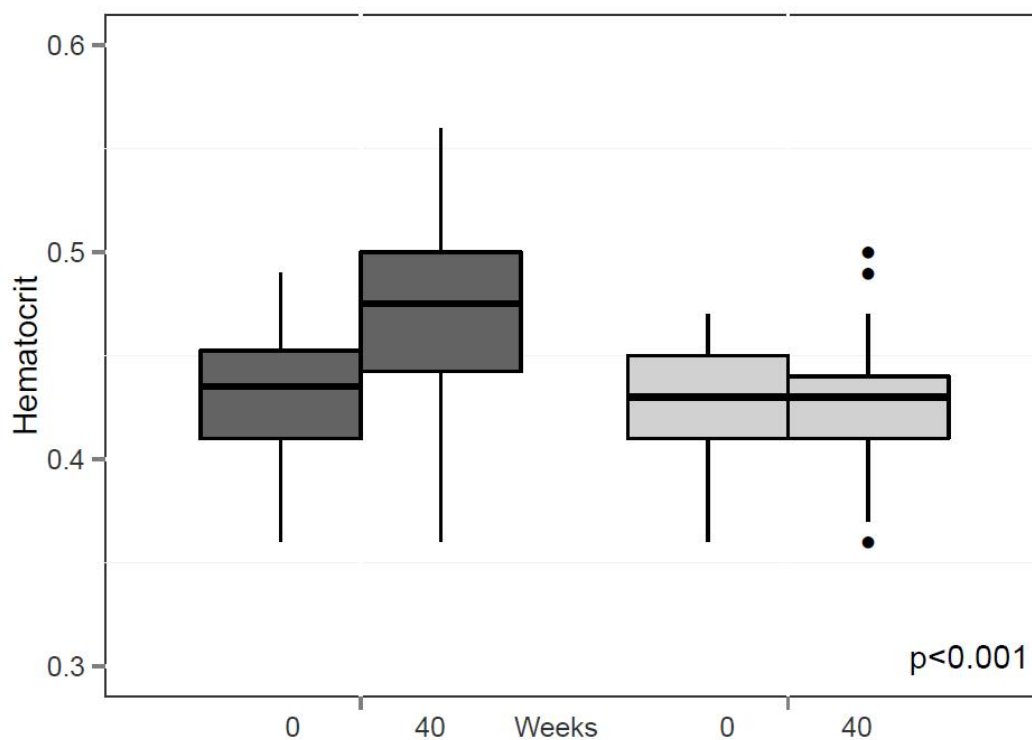

## SUPPLEMENTARY DATA

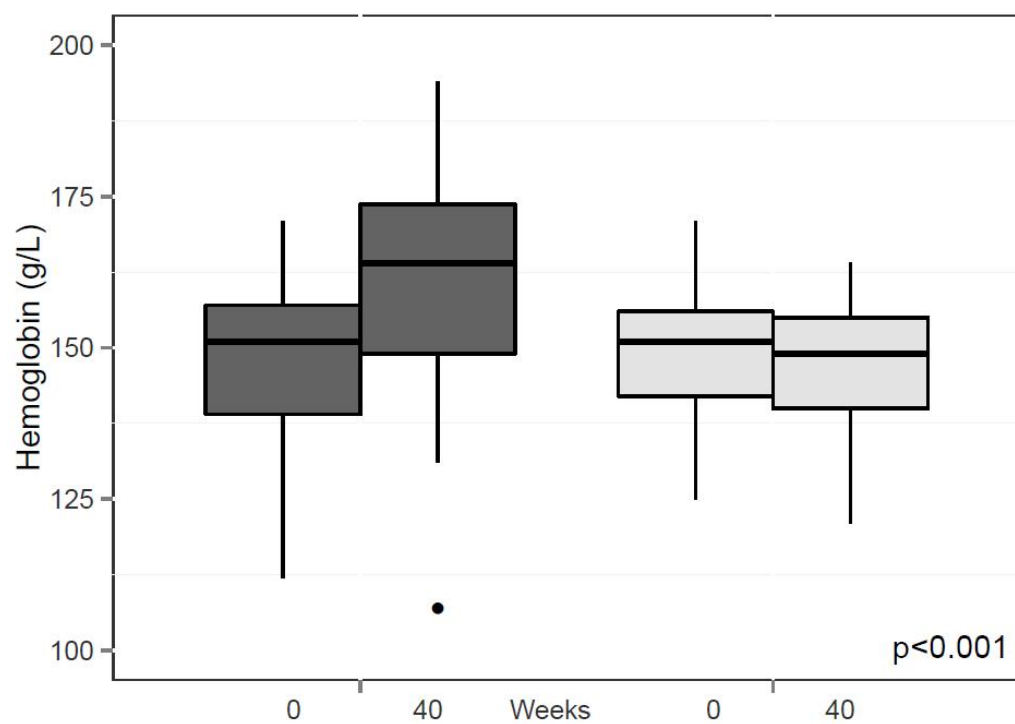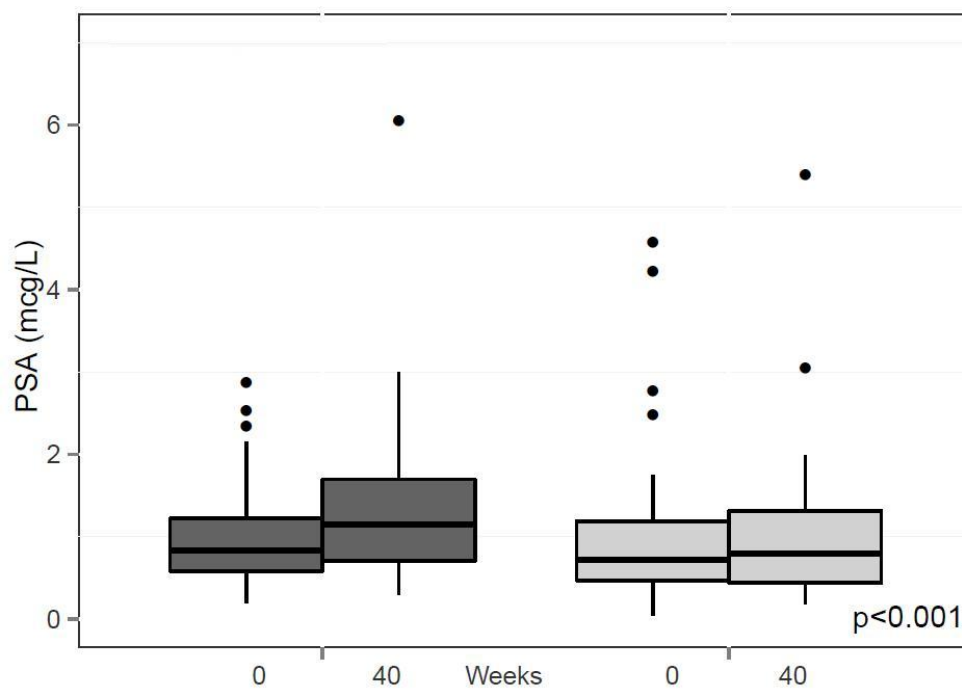

Supplement: dc132845supplementarydata.pdf [file dc132845supplementarydata.pdf]
